# Supplementary material for: Effect of menstrual cycle on resting metabolism: A systematic review and meta-analysis
Source: PLoS One. 2020 Jul 13;15(7):e0236025. doi: 10.1371/journal.pone.0236025 (PMC7357764; doi:10.1371/journal.pone.0236025)
Supplement: S1 Data — (CSV) [file pone.0236025.s002.csv]

Date	Author	Measure	Comment	Age(yrs)	AgeRange	BMI(kg/m2)	Units	FollicularN	FMean	FSD	FSE	FSE Derived	LutealN	LMean	LSD	LSE	LSE Derived	EffectSize	StandardError
1989	Bisdee	MetabolicChamber	BMR late phase	26.3	19-32	22.8	kJ/d	8	6024	351		124.12	8	6643	817		288.9	1.0523	0.533
1992	Meijer	MetabolicChamber	SMR				kj/m	16	4.02	0.43		0.11	16	4.33	0.45		0.11	0.7277	0.365
1993	Howe	IndirectCalorimetry	RMR	31	20-40	24.8	MJ/d	14	6.53		0.34	0.34	14	6.52		0.32	0.32	-0.0084	0.378
1994	Lariviere	IndirectCalorimetry	RMR	24	20-30	20.8	kJ/h	8	199	12		4.24	8	218	22		7.78	1.1462	0.54
1995	Piers	VentilatedHood	RMR	26.9		20.1	kJ/m	13	3.18	0.21		0.06	13	3.16	0.25		0.07	-0.0886	0.392
1996	Melanson	IndirectCalorimetry	RMR				kJ/d	8	5234		543	543	8	5314		405	405	0.0631	0.5
1997	Tai	MetabolicCart	RMR	27.9	22-38	21.3	kJ/m	8	3.92		0.1	0.1	8	3.91		0.17	0.17	-0.0271	0.5
1998	Matsuo	IndirectCalorimetry	RMR	18.7	18-19	20.6	J/kg/m	9	62.5		1.6	1.6	9	67		1.2	1.2	1.125	0.507
1999	Li	IndirectCalorimetry	RMR average	21.3	19-24	19.5	kJ/d	19	5018	387		88.78	19	5098	420		96.35	0.2035	0.325
1999	Matsuo	IndirectCalorimetry	RMR		18-20	22.1	J/kg/m	7	67.3		3.1	3.1	7	70.2		2.9	2.9	0.3944	0.54
1999	Paolisso	IndirectCalorimetry	BMR	26.1		21.1	kJ/m	16	3.91		0.15	0.15	16	3.84		0.12	0.12	-0.1331	0.354
2000	Allen	IndirectCalorimetry	RMR-non-smoker	29		23.3	kcal/d	16	1343		38	38	16	1389		37	37	0.3167	0.356
			RMR-smoker			24.4	kcal/d	5	1352		138	138	5	1366		155	155	0.0477	0.633
2000	Fukuda	GasAnalyzer	EPOC-standard diet		21-22	20.3	L/7h	5	8.6	2.1		0.94	5	8.9	3.8		1.7	0.1092	0.633
2002	Horton	IndirectCalorimetry	RMR	29	18-39	21.4	kJ/m	10	4.29		0.12	0.12	10	4.43		0.12	0.12	0.3889	0.451
2002	Suh	OpenCircuitCalorimetry	RMR		22-30		kJ/m	7	4.9		0.1	0.1	5	4.9		0	0	0	0.633
2005	Day	IndirectCalorimetry	RMR	29		24	kJ/d	14	5757		180	180	14	5878		176	176	0.1885	0.379
2005	Uranga	IndirectCalorimetry	BMR	32		22.2	kcal/d	10	1278		47	47	10	1289		66	66	0.064	0.447
2006	Magkos	IndirectCalorimetry	RMR	27		25	kcal/m	7	0.93		0.03	0.03	7	0.94		0.02	0.02	0.1601	0.535
2009	Hall	IndirectCalorimetry	BMR				kcal/24h	15	1208		59	59	15	1272		56	56	0.2974	0.367
2015	Elliott	IndirectCalorimetry	RMR	23.7	21-28	20.2	kJ/d	13	4712	433		120.08	13	4883	574		159.18	0.3501	0.395
2015	Matsuda-Nakamura	IndirectCalorimetry	RMR	22		21.3	kJ/SqM/h	8	325.6		27.7	27.7	8	358.2		19.8	27.7	0.4448	0.506
